# Supplementary material
Source: publisher figshare collection journal article supplement (https://diabetesjournals.figshare.com/ndownloader/files/22395339)
Supplement: Supplementary file 1 [file 22395339]

**Supplementary Table 3 – Human islet antigen nomenclature**

| **Common abbreviation** | **Common name** | **UniProt name** | **Gene**  **symbol** | **Gene name** |
| --- | --- | --- | --- | --- |
| CHGA | Chromogranin A | Chromogranin-A | *CHGA* | Chromogranin A |
| DMK | Dystrophia myotonica kinase | Myotonin-protein kinase | *DMPK* | DM1 protein kinase |
| GAD65 | Glutamic acid decarboxylase 65 | Glutamate decarboxylase 2 | *GAD2* | Glutamate decarboxylase 2 |
| GFAP | Glial fibrillary acidic protein | Glial fibrillary acidic protein | *GFAP* | Glial fibrillary acidic protein |
| GRP78 | Glucose-regulated protein 78 | Endoplasmic reticulum chaperone BiP | *HSPA5* | Heat shock protein family A (Hsp70) member 5 |
| HSP60 | Heat shock protein 60 | 60 kDa heat shock protein, mitochondrial | *HSPD1* | Heat shock protein family D (Hsp60) member 1 |
| HSP70 | Heat shock protein 70 | Heat shock 70 kDa protein 1B | *HSPA1B* | Heat shock protein family A (Hsp70) member 1B |
| IA-2 | Insulinoma-associated protein 2 | Receptor-type tyrosine-protein phosphatase-like N | *PTPRN* | Protein tyrosine phosphatase receptor type N |
| IAPP | Islet amyloid polypeptide | Islet amyloid polypeptide | *IAPP* | Islet amyloid polypeptide |
| ICA69 | 69-kDa islet cell autoantigen | Islet cell autoantigen 1 | *ICA1* | Islet cell autoantigen 1 |
| IGRP | Islet-specific glucose-6-phosphatase catalytic subunit-related protein | Glucose-6-phosphatase 2 | *G6PC2* | Glucose-6-phosphatase catalytic subunit 2 |
| INS | Insulin | Insulin | *INS* | Insulin |
| ISL-1 | Islet-1 | Insulin gene enhancer protein ISL-1 | *ISL1* | ISL LIM homeobox 1 |
| KCNK16 | **Potassium channel subfamily K member 16** | **Potassium channel subfamily K member 16** | *KCNK16* | Potassium two pore domain channel subfamily K member 16 |
| KIF1A | Kinesin-like protein KIF1A | Kinesin-like protein KIF1A | *KIF1A* | Kinesin family member 1A |
| PC2 | Prohormone convertase 2 | Neuroendocrine convertase 2 | *PCSK2* | Proprotein convertase subtilisin/kexin type 2 |
| S100 | S100 | Protein S100-B | *S100B* | S100 calcium binding protein B |
| SCG5 | Secretogranin V | Neuroendocrine protein 7B2 | *SCG5* | Secretogranin V |
| UCN3 | Urocortin III | Urocortin-3 | *UCN3* | Urocortin 3 |
| VTDB | Vitamin D-binding protein | Vitamin D-binding protein | *GC* | GC vitamin D binding protein |
| ZnT8 | Zinc transporter 8 | Zinc transporter 8 | *SLC30A8* | Solute carrier family 30 member 8 |
